# Supplementary material for: Polyamines and Their Biosynthesis/Catabolism Genes Are Differentially Modulated in Response to Heat Versus Cold Stress in Tomato Leaves (Solanum lycopersicum L.)
Source: PubMed Central journal article supplement (PMC7465501; doi:10.3390/cells9081749), 2020-07-22

## Supplementary Information

### **Polyamines and their biosynthesis/catabolism genes are differentially modulated in response to heat versus cold stress in tomato leaves (*Solanum lycopersicum* L.)**

**Rakesh K. Upadhyay<sup>1,2</sup>, Tahira Fatima<sup>2</sup>, Avtar K. Handa<sup>2</sup>, Autar K. Mattoo<sup>1\*</sup>**

<sup>1</sup>Sustainable Agricultural Systems Laboratory, United States Department of Agriculture, Agricultural Research Service, Henry A. Wallace Beltsville Agricultural Research Center, Beltsville, MD 20705-2350, USA

<sup>2</sup>Center of Plant Biology, Department of Horticulture and Landscape Architecture, Purdue University, W. Lafayette, IN 47907, USA

\*Correspondence: Autar K. Mattoo ([autar.mattoo@usda.gov](mailto:autar.mattoo@usda.gov))

### Supplementary Tables

**Table S1:** The sequence identities of PA metabolic pathway genes identified from tomato genome in this study.

**Table S2:** List of genes and their primer sequences used for quantitative real– time PCR (qRT-PCR) analysis.

**Table S3:** Pearson correlation analyses among the levels of different forms of PAs during the cold or heat stresses

**Table S4:** Correlation among transcript levels of PA metabolic genes with free, conjugated and bound putrescine, spermidine and spermine

**Table S5:** Correlation among transcript levels of selected genes with free, conjugated and bound putrescine, spermidine and spermine

**Table S6:** Correlation among transcript levels of PA metabolic genes

**Table S7:** Correlation among transcript levels of PA metabolic genes and selected genes as shown

**Table S8:** Correlation among transcript levels of genes selected for comparison

**Table S9:** Statistically significant differences (p-value) among heat response genes expression studies and polyamines accumulation

**Table S10:** Statistical significance differences (p-value) in cold response time points among genes expression studies and polyamines accumulation

**Figure S1:** qRT-PCR of genes which encode proteins involved in photosynthetic machinery like nuclear encoded light-harvesting chlorophyll a/b-binding genes *LHCBI-6* and plastid encoded PSII complex gene *psbA* and *accD* genes in response to heat stress.

**Figure S2:** qRT-PCR of genes which encode proteins involved in photosynthetic machinery like nuclear encoded light-harvesting chlorophyll a/b-binding genes *LHCBI-6* and plastid encoded PSII complex gene *psbA* and *accD* genes in response to cold stress.

**Figure S3:** qRT-PCR of gene expression of phosphoenolpyruvate carboxylase (*PEPC*) and Isocitrate dehydrogenase (*ICDH*) genes in response to heat or cold stress

**Figure S4:** qRT-PCR mediated gene expression of ornithine decarboxylase (*OAT1*) gene in response to heat or cold stress

**Figure S5:** PCA analyses of active and variable parameters during heat stress.

**Figure S6:** PCA analyses of active and variable parameters during cold stress.

**Figure S7:** Cytoscape analyses of Pooled data from heat stress

**Figure S8:** Cytoscape analyses of Pooled data from cold stress

**Table S1:** The sequence identities of PA metabolic pathway genes identified from tomato genome in this study.

| Process                         | Polyamine Pathway Enzymes                                 | Gene Name          | SGN ID             | mRNA size (nt) |
|---------------------------------|-----------------------------------------------------------|--------------------|--------------------|----------------|
| Biosynthesis                    | Arginase (EC 3.5.3.1)                                     | <i>SIARG1</i>      | Solyc01g091160.2.1 | 1529           |
|                                 |                                                           | <i>SIARG2</i>      | Solyc01g091170.2.1 | 1405           |
|                                 | Arginine decarboxylase (EC 4.1.1.9)                       | <i>SIADC1</i>      | Solyc10g054440.1.1 | 2124           |
|                                 |                                                           | <i>SIADC2</i>      | Solyc01g110440.2.1 | 3558           |
|                                 | Ornithine decarboxylase (EC 4.1.1.17)                     | <i>SIODC1</i>      | Solyc04g082030.1.1 | 1296           |
|                                 |                                                           | <i>SIODC2</i>      | Solyc03g098300.1.1 | 1167           |
|                                 | N-carbamoylputrescine amidohydrolase (EC 3.5.1.53)        | <i>SICPA</i>       | Solyc11g068540.1.1 | 903            |
|                                 | Agmatine iminohydrolase /Agmatine deiminase (EC 3.5.3.12) | <i>SIAIH</i>       | Solyc12g038970.1.1 | 1128           |
|                                 | S-adenosylmethionine decarboxylase (EC 4.1.4.50)          | <i>SISamDc1</i>    | Solyc05g010420.1.1 | 1083           |
|                                 |                                                           | <i>SISamDc2</i>    | Solyc02g089610.1.1 | 1089           |
|                                 |                                                           | <i>SISamDc3</i>    | Solyc01g010050.2.1 | 3606           |
|                                 | Spermidine synthase (EC 2.5.1.16)                         | <i>SISPDS1</i>     | Solyc05g005710.2.1 | 1319           |
| <i>SISPDS2</i>                  |                                                           | Solyc04g026030.2.1 | 1240               |                |
| Spermine synthase (EC 2.5.1.22) | <i>SISPMS</i>                                             | Solyc08g061970.2.1 | 1267               |                |
| Catabolism                      | Flavin dependent polyamine oxidase (EC 1.5.3.11)          | <i>SIPAO4-Like</i> | Solyc02g081390.2.1 | 2082           |
|                                 |                                                           | <i>SIPAO2</i>      | Solyc01g087590.2.1 | 1850           |
|                                 | Copper dependent amine oxidase (EC 1.4.3.6)               | <i>SICuAO</i>      | Solyc08g079430.2.1 | 2369           |
|                                 |                                                           | <i>SICuAO-Like</i> | Solyc05g013440.2.1 | 2733           |

**Table S2:** List of genes and their primer sequences used for quantitative real– time PCR (qRT-PCR) analysis in this study.

| Gene Name           | SGN ID         | Forward Primer (5'-3')    | Reverse Primer (5'-3')        |
|---------------------|----------------|---------------------------|-------------------------------|
| <i>SIARG1</i>       | Solyc01g091160 | TACTGCCAAGATATCCAAGTGACC  | CCTCCCCAGTAAAGATGAGTACAA      |
| <i>SIARG2</i>       | Solyc01g091170 | GTAAGAGAAGCTTGCTGCCAAGATG | ATCTGCCAGACCTACCTAATGTGA      |
| <i>SIADC1</i>       | Solyc10g054440 | CTCGGGCGACTCCATAACC       | GCCCAGGGACTGCATAGGT           |
| <i>SIADC2</i>       | Solyc01g110440 | GGAGAAGGCGAAGGTGTTG       | ATTGGTATTGGTATTGGCATTGG       |
| <i>SIODC1</i>       | Solyc04g082030 | TGCGAGCTTTTGTTCGAAT       | GGTAATGCGCCGTATTTTGG          |
| <i>SIODC2</i>       | Solyc03g098300 | ACGAAAGAAAGTTGTGAAATACG   | CAAGATAGGTAGGTGTGGATAAC       |
| <i>SIAIH</i>        | Solyc12g038970 | GGTGCAATTATTACTCCGCAATTT  | CAATTTCCCTAGCACCTTCAATTC      |
| <i>SICPA</i>        | Solyc11g068540 | CGAGGGCTATTACTTTTGTCAAGC  | CTACTCCAAGCTCCTTTGCAAGAT      |
| <i>SISAMDC1</i>     | Solyc05g010420 | CCTGGTGCTCAATCGTTTCC      | TACCGGCAGCAAGCTTTCC           |
| <i>SISAMDC2</i>     | Solyc02g089610 | GCAATGATCGAGAGGGTGTG      | GGCCAGACTCGGTGTAAAGTTC        |
| <i>SISAMDC3</i>     | Solyc01g010050 | CCCGTGGGAGCTTCATCTT       | GCTATCAAGGACCGCAACTTCT        |
| <i>SISPDS1</i>      | Solyc05g005710 | GGAGGAGGAGATGGTGGTGTCC    | GCAACTCCGTCACCAATGTGGAGAT     |
| <i>SISPDS2</i>      | Solyc04g026030 | AAGGCTCTGTCAACTATGC       | GGTGTGGCTATCGTCAAC            |
| <i>SISPMS</i>       | Solyc08g061970 | GATACTGGCATCTTCGTAAGTC    | GCTTGGTTGTGTTGTAATG           |
| <i>SIPAO2</i>       | Solyc01g087590 | TGATGGAAGGAAGAATGAGAG     | CCAGCAGAGGTTCACTTAG           |
| <i>SIPAO4-like</i>  | Solyc02g081390 | CCACTTCATATGCTTGCGGTTA    | TCGAGGTCACAAGCAAGTCTTC        |
| <i>SICuAO4</i>      | Solyc08g079430 | CGATTTCCCAATCATCCTTT      | CCGCAATTGAATGAACGATTT         |
| <i>SICuAO4-like</i> | Solyc05g013440 | CAATCGCACTGGGCAGTTAA      | CTCCTCAAGAAATTTGCTCTGA        |
| <i>SITIP41</i>      | Solyc10g049850 | AACCACATTTCAAGCCTTGTCTT   | CATGGAGTTTTTGAGTCTTCTGCAT     |
| <i>SIUBI3</i>       | Solyc01g056940 | TCGTAAGGAGTGCCCTAATGCTGA  | CAATCGCCTCCAGCCTTGTGTAA       |
| <i>SIHSP17.6</i>    | Solyc06g076560 | AGGTCAAGTCCATTGAGATTTCTG  | ACAGAGCAACTTCAAACCTTCAAC      |
| <i>SIHSP20.0</i>    | Solyc06g076570 | AAGATTTAGACTTCCGGAGAATGC  | GCCCATACAAGGATACAATAAATTCACAT |
| <i>SIHSP20.1</i>    | Solyc06g076540 | CTGTTCCAAAGGAAGAAGTGAAGA  | AGAAACAGCGACAACCTCAAACACT     |
| <i>SICBF1</i>       | Solyc03g026280 | TCAGGCCGTGCAAACTTTCC      | ATGTAGGCATCAGTTTCCACACA       |
| <i>SICBF2</i>       | Solyc03g124110 | ACTTCGTGGATGAGGAAGCG      | GGCATATAAGCGTGACATCAG         |
| <i>SICBF3</i>       | Solyc03g026270 | CGCCGAAATCTTCCGACCTT      | ACCCGGCATGCAGAATAACG          |
| <i>SILHCB1</i>      | Solyc03g005770 | AGTGAAGGAGATCAAGAACGGCA   | GTCAGCAATGTGGTCGGCAA          |
| <i>SILHCB2</i>      | Solyc12g006140 | GTGTCACCATGCGACGTAAGT     | GTCCAGCAGTGTCATCCCA           |
| <i>SILHCB3</i>      | Solyc07g063600 | CTCTTGAGGTTATCCATGGGAGATG | AGTCCAGCCCACCTTCACTG          |
| <i>SILHCB4</i>      | Solyc09g014520 | GATCCATTGGGCTTGTCTGC      | CAAGAACGCAACCATGGCGA          |
| <i>SILHCB5</i>      | Solyc06g063370 | TTGGTGCCAACTGTGGTCTT      | AACCTCTGCGACGACAGCAA          |
| <i>SILHCB6</i>      | Solyc01g105050 | TGAGGCTGGACAAGGGAAGAC     | AACTCAACGGCTCTTTCACA          |
| <i>SIICDH</i>       | Solyc11g011930 | GGAGAGTTCATCGATGCTGA      | TCTGACACCTTAATCCCAAACA        |
| <i>SIPEPC</i>       | Solyc07g062530 | ATGAAAGGTATTGCTGCTGGA     | TCGAGAAGCTACTAAACAAGAGG       |
| <i>SlpsbA</i>       | NC_007898.3    | ATATCGTAGCCGCTCATGGTTATT  | CAGATACCTACTACAGGCCAAGCA      |
| <i>SlaccD</i>       | NC_007898.3    | AAGGTTCAACAAGCAGCTGAATACT | CGTGGAGCTTAAATAACTCACTCAG     |

**Table S3:** Pearson correlation analyses among the levels of different forms of PAs during the cold or heat stresses

| Table S2 | PUT-F | SPD-F | SPM-F | PUT-C | SPD-C | SPM-C | PUT-B | SPD-B | SPM-B |
|----------|-------|-------|-------|-------|-------|-------|-------|-------|-------|
| PUT-FC   | 1.0   | -1.0  | -1.0  |       | -0.9  | -1.0  | 0.9   | 1.0   | -0.8  |
| PUT-FH   | 1.0   |       | -0.9  | 0.9   | 0.9   | -0.8  | -0.8  | 0.8   |       |
| SPD-FC   | -1.0  | 1.0   | 1.0   |       | 0.9   | 1.0   | -0.9  | -1.0  | 0.8   |
| SPD-FH   |       | 1.0   |       | 0.8   | 0.8   |       |       |       |       |
| SPM-FC   | -1.0  | 1.0   | 1.0   |       | 0.9   | 1.0   | -0.8  | -0.9  |       |
| SPM-FH   | -0.9  |       | 1.0   | -1.0  | -0.9  | 0.9   |       | -0.9  |       |
| PUT-CC   |       |       |       | 1.0   |       |       |       |       |       |
| PUT-CH   | 0.9   |       | -1.0  | 1.0   | 1.0   | -1.0  |       | 1.0   |       |
| SPD-CC   | -0.9  | 0.9   | 0.9   |       | 1.0   | 1.0   | -1.0  | -1.0  | 0.9   |
| SPD-CH   | 0.9   | 0.8   | -0.9  | 1.0   | 1.0   | -0.8  |       | 0.9   |       |
| SPM-CC   | -1.0  | 1.0   | 1.0   |       | 1.0   | 1.0   | -0.9  | -1.0  | 0.8   |
| SPM-CH   | -0.8  |       | 0.9   | -1.0  | -0.8  | 1.0   | 0.8   | -1.0  |       |
| PUT-BC   | 0.9   | -0.9  | -0.8  |       | -1.0  | -0.9  | 1.0   | 1.0   | -1.0  |
| PUT-BH   | -0.8  |       |       |       |       | 0.8   | 1.0   |       |       |
| SPD-BC   | 1.0   | -1.0  | -0.9  |       | -1.0  | -1.0  | 1.0   | 1.0   | -0.9  |
| SPD-BH   | 0.8   |       | -0.9  | 1.0   | 0.9   | -1.0  |       | 1.0   |       |
| SPM-BC   |       |       |       |       | 0.9   | 0.8   | -1.0  | -0.9  | 1.0   |
| SPM-BH   |       |       |       |       |       |       |       |       | 1.0   |

NOTE: Red and Blue number indicate positive ( $\geq 0.8$ ) and negative ( $< 0.8$ ) Pearson correlation coefficients, respectively. C and B at the end of PAs abbreviations shows cold or heat stress, respectively.

**Table S4:** Correlation among transcript levels of PA metabolic genes with free, conjugated and bound putrescine, spermidine and spermine

| Table S3        | PUT-F | SPD-F | SPM-F | PUT-C | SPD-C | SPM-C | PUT-B | SPD-B | SPM-B |
|-----------------|-------|-------|-------|-------|-------|-------|-------|-------|-------|
| <b>ARG1-C</b>   |       |       |       |       |       |       |       |       |       |
| <b>ARG1-H</b>   | -0.9  |       | 1.0   | -0.9  | -0.8  | 0.9   | 0.8   | -1.0  |       |
| <b>ARG2-C</b>   |       |       |       |       |       |       |       |       |       |
| <b>ARG2-H</b>   |       |       | 0.9   | -0.8  | -0.9  |       |       |       |       |
| <b>ADC1-C</b>   | 0.8   | -0.8  | -0.8  |       | -0.9  | -0.8  | 0.8   | 0.9   | -0.8  |
| <b>ADC1-H</b>   |       |       |       |       |       |       |       |       |       |
| <b>ADC2-C</b>   |       |       |       |       | -0.8  | -0.8  | 0.8   | 0.8   |       |
| <b>ADC2-H</b>   |       |       |       |       |       |       |       |       |       |
| <b>ODC1-C</b>   | 0.9   | -0.9  | -0.9  |       | -1.0  | -0.9  | 1.0   | 1.0   | -0.9  |
| <b>ODC1-H</b>   |       | 0.8   |       |       |       |       |       |       |       |
| <b>ODC2-C</b>   | -1.0  | 1.0   | 1.0   |       | 0.8   | 0.9   |       | -0.9  |       |
| <b>ODC2-H</b>   | -0.9  |       | 0.8   | -0.8  |       |       | 0.9   |       |       |
| <b>AIH1-C</b>   |       |       |       |       |       |       |       |       |       |
| <b>AIH1-H</b>   |       |       | 0.9   | -0.8  |       | 0.8   |       | -0.9  |       |
| <b>CPA-C</b>    |       |       |       |       | -0.8  |       | 0.9   |       | -0.9  |
| <b>CPA-H</b>    |       |       | 0.9   | -0.8  |       |       |       | -0.8  |       |
| <b>SAMDC1-C</b> |       |       |       |       | -0.8  | -0.8  |       | 0.8   |       |
| <b>SAMDC1-H</b> |       |       |       |       |       |       |       |       |       |
| <b>SAMDC2-C</b> | 0.8   | -0.8  | -0.8  |       | -0.8  | -0.8  | 0.8   | 0.8   | -0.8  |
| <b>SAMDC2-H</b> |       |       |       |       |       |       |       |       |       |
| <b>SAMDC3-C</b> |       |       |       |       |       |       |       |       |       |
| <b>SAMDC3-H</b> |       |       |       |       |       |       |       |       | -0.9  |
| <b>SPDS1-C</b>  |       |       |       |       | -0.8  |       | 0.8   | 0.8   | -0.8  |
| <b>SPDS1-H</b>  |       |       | 0.8   |       |       |       |       |       |       |
| <b>SPDS2-C</b>  |       |       |       |       |       |       |       |       |       |
| <b>SPDS2-H</b>  |       | 0.8   |       |       |       |       |       |       |       |
| <b>SPMS-C</b>   |       |       |       |       |       |       |       |       |       |
| <b>SPMS-H</b>   | 0.9   |       | -1.0  | 1.0   | 1.0   | -0.9  |       | 0.9   |       |
| <b>PAO2-C</b>   | 0.9   | -0.9  | -0.8  |       | -0.9  | -0.9  | 0.9   | 0.9   | -0.9  |
| <b>PAO2-H</b>   |       |       |       |       |       |       |       |       |       |
| <b>PAO4I-C</b>  |       |       |       |       |       |       |       |       |       |
| <b>PAO4I-H</b>  |       |       |       |       |       |       |       |       |       |
| <b>CuAO4-C</b>  |       |       |       | -0.9  |       |       |       |       |       |
| <b>CuAO4-H</b>  |       |       |       |       |       |       |       |       |       |
| <b>CuAO4I-C</b> |       |       |       |       |       |       |       |       |       |
| <b>CuAO4I-H</b> |       |       |       |       |       |       | 0.9   |       |       |

NOTE: PAO4-like did not show strong +ve or -ve correlation with any form of PAs. Other details are the same as in Supplemental Table 2.

**Table S5:** Correlation among transcript levels of selected genes with free, conjugated and bound putrescine, spermidine and spermine

| Table S4  | PUT-F | SPD-F | SPM-F | PUT-C | SPD-C | SPM-C | PUT-B | SPD-B | SPM-B |
|-----------|-------|-------|-------|-------|-------|-------|-------|-------|-------|
| OAT1-H    |       |       |       |       |       |       | 0.9   |       |       |
| PEPC-C    |       |       | -0.8  |       |       | -0.8  |       |       |       |
| PEPC-H    |       |       |       |       |       |       | 0.9   |       |       |
| CDH-C     |       |       |       |       | -0.8  |       | 0.8   |       | -0.9  |
| CDH-H     |       | 0.9   |       |       |       |       |       |       |       |
| Lhcb1-C   |       |       |       |       |       |       |       |       |       |
| Lhcb1-H   | 0.9   | 0.9   | -0.8  | 0.9   | 0.9   | -0.9  |       | 0.9   |       |
| Lhcb2-C   |       |       |       |       |       |       |       |       |       |
| Lhcb2-H   | 0.9   |       | -1.0  | 1.0   | 0.9   | -0.9  |       | 1.0   |       |
| Lhcb3-C   |       |       |       |       |       |       |       |       |       |
| Lhcb3-H   |       |       |       |       |       |       |       |       |       |
| Lhcb4-C   |       |       |       |       |       |       |       |       |       |
| Lhcb4-H   |       |       |       |       |       |       |       |       |       |
| Lhcb5-C   |       |       |       |       |       |       |       |       |       |
| Lhcb5-H   |       | 1.0   |       |       |       |       |       |       | -0.8  |
| Lhcb6-C   |       |       |       |       |       |       |       |       |       |
| Lhcb6-H   |       | 1.0   |       |       |       |       |       |       | -0.8  |
| psbA-C    | 0.9   | -0.9  | -0.9  |       | -0.8  | -0.9  |       | 0.8   |       |
| psbA-H    |       |       |       |       |       |       |       |       | -1.0  |
| accD-C    |       |       |       |       |       |       |       |       |       |
| accD-H    |       |       |       |       |       |       | 1.0   |       |       |
| HSP17.6-H |       |       | -0.9  | 0.9   | 0.9   | -0.9  |       | 0.9   |       |
| HSP20.0-H | 0.8   |       | -1.0  | 1.0   | 0.9   | -0.9  |       | 0.9   |       |
| HSP20.1-H | 0.9   |       | -0.9  | 0.8   | 0.8   |       |       | 0.8   |       |
| CBF1-C    |       |       |       |       |       |       | -0.8  |       | 0.9   |
| CBF2-C    |       |       |       | 0.8   |       |       |       |       | 0.8   |
| CBF3-C    |       |       |       | 0.9   |       |       |       |       |       |

NOTE: *Lhcb3* and *Lhcb4* did not show strong +ve or -ve correlation with any Form of PAs. Other details are the same as in Supplemental Table 2.

**Table S6:** Correlation among transcript levels of PA metabolic genes

| Table S5 | ARG1 | ARG2 | ADC1 | ADC2 | ODC1 | ODC2 | AIH1 | CPA  | SAMDC1 | SAMDC2 | SAMDC3 | SPDS1 | SPDS2 | SPMS | PAO2 | PAO4like | CuAO4 | CuAO4like |
|----------|------|------|------|------|------|------|------|------|--------|--------|--------|-------|-------|------|------|----------|-------|-----------|
| ARG1-C   | 1.0  | 0.8  |      |      |      |      |      |      |        |        |        |       |       | 1.0  |      |          | 0.8   |           |
| ARG1-H   | 1.0  |      |      |      |      | 0.9  | 0.9  | 0.8  |        |        |        | 0.8   |       | -0.9 |      | 0.8      | 0.8   |           |
| ARG2-C   | 0.8  | 1.0  |      |      |      |      |      |      |        |        |        |       |       |      |      |          |       |           |
| ARG2-H   |      | 1.0  |      |      |      |      |      | 0.8  |        |        |        |       |       | -0.9 |      |          |       |           |
| ADC1-C   |      |      | 1.0  | 1.0  | 0.9  | -0.8 | 0.9  |      | 1.0    | 1.0    | 0.9    | 1.0   | 1.0   |      | 1.0  | 0.8      |       | 0.9       |
| ADC1-H   |      |      | 1.0  |      |      |      |      |      |        |        |        |       |       |      |      |          |       |           |
| ADC2-C   |      |      | 1.0  | 1.0  | 0.8  | -0.8 | 1.0  |      | 1.0    | 1.0    | 1.0    | 1.0   | 1.0   |      | 1.0  | 0.9      |       | 0.9       |
| ADC2-H   |      |      |      | 1.0  | 0.8  |      |      |      | 0.9    |        |        |       | 1.0   |      | 0.9  |          |       |           |
| ODC1-C   |      |      | 0.9  | 0.8  | 1.0  | -0.8 |      | 0.8  | 0.8    | 0.9    |        | 0.9   | 0.8   |      | 1.0  |          |       |           |
| ODC1-H   |      |      |      | 0.8  | 1.0  |      |      |      |        |        |        |       | 0.8   |      | 0.8  |          |       |           |
| ODC2-C   |      |      | -0.8 | -0.8 | -0.8 | 1.0  |      |      | -0.8   | -0.9   |        |       | -0.8  |      | -0.8 | -0.8     |       |           |
| ODC2-H   | 0.9  |      |      |      |      | 1.0  |      |      |        |        |        |       |       |      |      |          |       | 0.8       |
| AIH1-C   |      |      | 0.9  | 1.0  |      |      | 1.0  |      | 1.0    | 0.9    | 1.0    | 0.9   | 1.0   |      | 0.8  | 0.9      |       | 1.0       |
| AIH1-H   | 0.9  |      |      |      |      |      | 1.0  | 0.9  |        |        | 0.8    | 0.9   |       | -0.8 |      | 0.8      | 0.9   |           |
| CPA-C    |      |      |      |      | 0.8  |      |      | 1.0  |        |        |        |       |       |      |      |          |       |           |
| CPA-H    | 0.8  | 0.8  |      |      |      |      | 0.9  | 1.0  |        |        | 0.8    | 1.0   |       | -0.9 |      |          | 1.0   |           |
| SAMDC1-C |      |      | 1.0  | 1.0  | 0.8  | -0.8 | 1.0  |      | 1.0    | 1.0    | 1.0    | 1.0   | 1.0   |      | 0.9  | 0.9      |       | 0.9       |
| SAMDC1-H |      |      |      | 0.9  |      |      |      |      | 1.0    |        |        |       | 0.9   |      | 1.0  | 0.8      |       |           |
| SAMDC2-C |      |      | 1.0  | 1.0  | 0.9  | -0.9 | 0.9  |      | 1.0    | 1.0    | 0.9    | 1.0   | 1.0   |      | 1.0  | 0.8      |       | 0.9       |
| SAMDC2-H |      |      |      |      |      |      |      |      |        | 1.0    |        |       |       |      |      |          |       | 0.9       |
| SAMDC3-C |      |      | 0.9  | 1.0  |      |      | 1.0  |      | 1.0    | 0.9    | 1.0    | 0.9   | 1.0   |      | 0.8  | 0.9      |       | 1.0       |
| SAMDC3-H |      |      |      |      |      |      | 0.8  | 0.8  |        |        | 1.0    | 0.9   |       |      |      |          | 0.9   |           |
| SPDS1-C  |      |      | 1.0  | 1.0  | 0.9  |      | 0.9  |      | 1.0    | 1.0    | 0.9    | 1.0   | 1.0   |      | 0.9  |          |       | 0.9       |
| SPDS1-H  | 0.8  |      |      |      |      |      | 0.9  | 1.0  |        |        | 0.9    | 1.0   |       |      |      |          | 1.0   |           |
| SPDS2-C  |      |      | 1.0  | 1.0  | 0.8  | -0.8 | 1.0  |      | 1.0    | 1.0    | 1.0    | 1.0   | 1.0   |      | 0.9  | 0.9      |       | 1.0       |
| SPDS2-H  |      |      |      | 1.0  | 0.8  |      |      |      | 0.9    |        |        |       | 1.0   |      | 0.9  |          |       |           |
| SPMS-C   | 1.0  |      |      |      |      |      |      |      |        |        |        |       |       | 1.0  |      | -0.8     | 0.9   |           |
| SPMS-H   | -0.9 | -0.9 |      |      |      |      | -0.8 | -0.9 |        |        |        |       |       | 1.0  |      |          |       |           |
| PAO2-C   |      |      | 1.0  | 1.0  | 1.0  | -0.8 | 0.8  |      | 0.9    | 1.0    | 0.8    | 0.9   | 0.9   |      | 1.0  |          |       | 0.8       |
| PAO2-H   |      |      |      | 0.9  | 0.8  |      |      |      | 1.0    |        |        |       | 0.9   |      | 1.0  |          |       |           |
| PAO4I-C  |      |      | 0.8  | 0.9  |      | -0.8 | 0.9  |      | 0.9    | 0.8    | 0.9    |       | 0.9   | -0.8 |      | 1.0      | -0.9  | 0.9       |
| PAO4I-H  | 0.8  |      |      |      |      |      | 0.8  |      | 0.8    |        |        |       |       |      |      | 1.0      |       | 0.8       |
| CuAO4-C  | 0.8  |      |      |      |      |      |      |      |        |        |        |       |       | 0.9  |      | -0.9     | 1.0   |           |
| CuAO4-H  | 0.8  |      |      |      |      |      | 0.9  | 1.0  |        |        | 0.9    | 1.0   |       |      |      |          | 1.0   |           |
| CuAO4I-C |      |      | 0.9  | 0.9  |      |      | 1.0  |      | 0.9    | 0.9    | 1.0    | 0.9   | 1.0   |      | 0.8  | 0.9      |       | 1.0       |
| CuAO4I-H |      |      |      |      |      | 0.8  |      |      |        | 0.9    |        |       |       |      |      | 0.8      |       | 1.0       |





**Table S8:** Correlation among transcript levels of genes selected for comparison

| Table S7         | <i>OAT1</i> | <i>PEPC</i> | <i>CDH</i> | <i>Lhcb1</i> | <i>Lhcb2</i> | <i>Lhcb3</i> | <i>Lhcb4</i> | <i>Lhcb5</i> | <i>Lhcb6</i> | <i>psbA</i> | <i>accD</i> | <i>HSP17.6</i> | <i>HSP20.0</i> | <i>HSP20.1</i> | <i>CBF1</i> | <i>CBF2</i> | <i>CBF3</i> |
|------------------|-------------|-------------|------------|--------------|--------------|--------------|--------------|--------------|--------------|-------------|-------------|----------------|----------------|----------------|-------------|-------------|-------------|
| <i>OAT1-C</i>    | 1.0         | 0.8         | 0.9        | -0.8         | -0.8         | -0.9         | -0.9         | -0.9         | -1.0         |             |             |                |                |                | -0.8        | -0.8        |             |
| <i>OAT1-H</i>    | 1.0         | 1.0         |            |              |              |              |              |              |              |             | 0.9         |                |                |                |             |             |             |
| <i>PEPC-C</i>    | 0.8         | 1.0         |            |              |              |              |              |              |              |             |             |                |                |                |             |             |             |
| <i>PEPC-H</i>    | 1.0         | 1.0         |            |              |              |              |              |              |              |             | 0.9         |                |                |                |             |             |             |
| <i>CDH-C</i>     | 0.9         |             | 1.0        |              |              | -0.8         |              | -0.8         | -1.0         |             |             |                |                |                | -1.0        | -0.9        |             |
| <i>CDH-H</i>     |             |             | 1.0        |              |              |              | 0.8          | 0.8          | 0.9          |             |             |                |                |                |             |             |             |
| <i>Lhcb1-C</i>   | -0.8        |             |            | 1.0          | 1.0          | 0.9          | 1.0          | 0.9          | 0.8          |             | 0.8         |                |                |                |             |             |             |
| <i>Lhcb1-H</i>   |             |             |            | 1.0          | 0.9          | 1.0          |              | 0.8          | 0.8          |             |             | 0.8            | 0.8            |                |             |             |             |
| <i>Lhcb2-C</i>   | -0.8        |             |            | 1.0          | 1.0          | 0.9          | 1.0          | 0.9          | 0.8          |             | 0.9         |                |                |                |             |             |             |
| <i>Lhcb2-H</i>   |             |             |            | 0.9          | 1.0          | 0.9          |              |              |              |             |             | 0.9            | 1.0            | 0.9            |             |             |             |
| <i>Lhcb3-C</i>   | -0.9        |             | -0.8       | 0.9          | 0.9          | 1.0          | 1.0          | 1.0          | 1.0          |             |             |                |                |                | 0.8         | 0.8         |             |
| <i>Lhcb3-H</i>   |             |             |            | 1.0          | 0.9          | 1.0          |              | 0.9          | 0.8          |             |             | 0.8            | 0.8            |                |             |             |             |
| <i>Lhcb4-C</i>   | -0.9        |             |            | 1.0          | 1.0          | 1.0          | 1.0          | 0.9          | 0.9          |             | 0.8         |                |                |                |             |             |             |
| <i>Lhcb4-H</i>   |             |             | 0.8        |              |              |              | 1.0          | 1.0          | 0.9          | 0.8         |             |                |                |                |             |             |             |
| <i>Lhcb5-C</i>   | -0.9        |             | -0.8       | 0.9          | 0.9          | 1.0          | 0.9          | 1.0          | 0.9          |             |             |                |                |                | 0.8         | 0.9         | 0.8         |
| <i>Lhcb5-H</i>   |             |             | 0.8        | 0.8          |              | 0.9          | 1.0          | 1.0          | 1.0          |             |             |                |                |                |             |             |             |
| <i>Lhcb6-C</i>   | -1.0        |             | -1.0       | 0.8          | 0.8          | 1.0          | 0.9          | 0.9          | 1.0          |             |             |                |                |                | 0.9         | 0.9         |             |
| <i>Lhcb6-H</i>   |             |             | 0.9        | 0.8          |              | 0.8          | 0.9          | 1.0          | 1.0          |             |             |                |                |                |             |             |             |
| <i>psbA-C</i>    |             |             |            |              |              |              |              |              |              | 1.0         | 0.9         |                |                |                |             |             |             |
| <i>psbA-H</i>    |             |             |            |              |              |              | 0.8          |              |              | 1.0         |             |                |                |                |             |             |             |
| <i>accD-C</i>    |             |             |            | 0.8          | 0.9          |              | 0.8          |              |              | 0.9         | 1.0         |                |                |                |             |             |             |
| <i>accD-H</i>    | 0.9         | 0.9         |            |              |              |              |              |              |              |             | 1.0         |                |                |                |             |             |             |
| <i>HSP17.6-H</i> |             |             |            | 0.8          | 0.9          | 0.8          |              |              |              |             |             | 1.0            | 1.0            |                |             |             |             |
| <i>HSP20.0-H</i> |             |             |            | 0.8          | 1.0          | 0.8          |              |              |              |             |             | 1.0            | 1.0            | 0.8            |             |             |             |
| <i>HSP20.1-H</i> |             |             |            |              | 0.9          |              |              |              |              |             |             |                | 0.8            | 1.0            |             |             |             |
| <i>CBF1-C</i>    | -0.8        |             | -1.0       |              |              | 0.8          |              | 0.8          | 0.9          |             |             |                |                |                | 1.0         | 1.0         | 0.9         |
| <i>CBF2-C</i>    | -0.8        |             | -0.9       |              |              | 0.8          |              | 0.9          | 0.9          |             |             |                |                |                | 1.0         | 1.0         | 1.0         |
| <i>CBF3-C</i>    |             |             |            |              |              |              |              | 0.8          |              |             |             |                |                |                | 0.9         | 1.0         | 1.0         |

**Table S9:** Statistically significant differences (p-value) among heat response genes expression studies and polyamines accusation

| Category            | Time Points→       | 0h vs ½ h            | 0h vs 1h             | 0h vs 6h             | 0h vs 12h            | 0h vs 24h             |
|---------------------|--------------------|----------------------|----------------------|----------------------|----------------------|-----------------------|
| Genes               | <i>SIARG1</i>      | 0.04*                | 0.02*                | 0.004**              | 0.01*                | 0.003**               |
|                     | <i>SIARG2</i>      | 0.09 <sup>ns</sup>   | 0.006**              | 0.001***             | 0.02*                | 0.01*                 |
|                     | <i>SIADC1</i>      | <0.0002***           | <0.0005***           | <0.0004****          | <0.0229*             | <0.0004****           |
|                     | <i>SIADC2</i>      | <0.0001****          | <0.0003***           | <0.0003****          | <0.0001****          | <0.0001***            |
|                     | <i>SIODC1</i>      | <0.0001              | 0.0001               | 0.0002               | <0.0001              | 0.0001                |
|                     | <i>SIODC2</i>      | <0.0001****          | 0.0008***            | 0.0007***            | 0.0037**             | 0.0010***             |
|                     | <i>SIAIH</i>       | <0.0001****          | 0.0115*              | 0.0004***            | 0.0231*              | 0.0001***             |
|                     | <i>SICPA</i>       | 0.0420*              | 0.0018**             | 0.0028**             | 0.0533 <sup>ns</sup> | 0.0061**              |
|                     | <i>SISAMDC1</i>    | 0.0008***            | 0.0331*              | 0.1658 <sup>ns</sup> | 0.0012**             | 0.6017 <sup>ns</sup>  |
|                     | <i>SISAMDC2</i>    | 0.0008***            | 0.0004***            | <0.0001****          | <0.0001****          | 0.3354 <sup>ns</sup>  |
|                     | <i>SISAMDC3</i>    | 0.0128*              | 0.9989 <sup>ns</sup> | 0.0015**             | 0.0569 <sup>ns</sup> | >0.9999 <sup>ns</sup> |
|                     | <i>SISPDS1</i>     | <0.0023**            | <0.0115*             | <0.0053**            | <0.0320*             | <0.0405*              |
|                     | <i>SISPDS2</i>     | <0.0004***           | <0.0004***           | <0.0027**            | <0.0030**            | <0.0103*              |
|                     | <i>SISPMS</i>      | 0.9826 <sup>ns</sup> | 0.6504 <sup>ns</sup> | 0.0022**             | 0.0010**             | 0.0053**              |
|                     | <i>SIPAO2</i>      | 0.0523 <sup>ns</sup> | 0.2542 <sup>ns</sup> | 0.3383 <sup>ns</sup> | 0.0779 <sup>ns</sup> | 0.1060 <sup>ns</sup>  |
|                     | <i>SIPAO4-like</i> | 0.0036**             | 0.0053**             | 0.0065**             | 0.0943 <sup>ns</sup> | 0.0012**              |
|                     | <i>SICuAO4</i>     | 0.5500 <sup>ns</sup> | 0.0013**             | 0.0050**             | 0.1331 <sup>ns</sup> | 0.0050**              |
| <i>SICuAO4-like</i> | 0.0013**           | 0.0008***            | 0.0059**             | 0.1028 <sup>ns</sup> | 0.9945 <sup>ns</sup> |                       |

| Metabolite | Time Points→ | 0h vs ½ h            | 0h vs 1h             | 0h vs 6h             | 0h vs 12h            | 0h vs 24h            |
|------------|--------------|----------------------|----------------------|----------------------|----------------------|----------------------|
| Free       | PUT          | 0.1369 <sup>ns</sup> | 0.0668 <sup>ns</sup> | 0.0385*              | 0.0159*              | 0.0265*              |
|            | SPD          | 0.0493*              | 0.0444*              | 0.1747 <sup>ns</sup> | 0.0350*              | 0.0218*              |
|            | SPM          | 0.0073**             | 0.3288 <sup>ns</sup> | 0.0532 <sup>ns</sup> | 0.0118*              | 0.0088**             |
| Conjugated | PUT          | 0.0391*              | 0.6638 <sup>ns</sup> | 0.0511 <sup>ns</sup> | 0.0539 <sup>ns</sup> | 0.0471*              |
|            | SPD          | 0.0142*              | 0.1403 <sup>ns</sup> | 0.0319*              | 0.0141*              | 0.0052**             |
|            | SPM          | 0.2263 <sup>ns</sup> | 0.1777 <sup>ns</sup> | 0.9148 <sup>ns</sup> | 0.9907 <sup>ns</sup> | 0.9063 <sup>ns</sup> |
| Bound      | PUT          | 0.8082 <sup>ns</sup> | 0.9791 <sup>ns</sup> | 0.4184 <sup>ns</sup> | 0.0635 <sup>ns</sup> | 0.3709 <sup>ns</sup> |
|            | SPD          | 0.2420 <sup>ns</sup> | 0.6366 <sup>ns</sup> | 0.0056**             | 0.0099**             | 0.0076**             |
|            | SPM          | 0.3671 <sup>ns</sup> | 0.3213 <sup>ns</sup> | 0.0335*              | 0.7978 <sup>ns</sup> | 0.6318 <sup>ns</sup> |

**Table S10:** Statistically significant differences (p-value) in cold response time points among genes expression studies and polyamines accusation

| Genes                     | Time Points→        | 0h vs 1h              | 0h vs 6h             | 0h vs 12h             | 0h vs 24h            |
|---------------------------|---------------------|-----------------------|----------------------|-----------------------|----------------------|
| PUT<br>Biosynthesis       | <i>SIARG1</i>       | 0.0452*               | 0.0003***            | 0.04746 <sup>ns</sup> | 0.0121*              |
|                           | <i>SIARG2</i>       | 0.0796 <sup>ns</sup>  | 0.0260*              | 0.0027**              | 0.0100**             |
|                           | <i>SIADC1</i>       | 0.0343*               | 0.0051**             | 0.0041**              | 0.0083**             |
|                           | <i>SIADC2</i>       | 0.0048**              | 0.0007***            | 0.0007***             | <0.0001****          |
|                           | <i>SIODC1</i>       | 0.1114 <sup>ns</sup>  | 0.0823 <sup>ns</sup> | 0.0012**              | 0.0024**             |
|                           | <i>SIODC2</i>       | 0.3323 <sup>ns</sup>  | 0.0189*              | 0.0018**              | <0.0001****          |
|                           | <i>SIAIH</i>        | 0.0171*               | 0.3971 <sup>ns</sup> | 0.5436 <sup>ns</sup>  | 0.0003***            |
|                           | <i>SICPA</i>        | >0.9999 <sup>ns</sup> | 0.0075**             | 0.0527 <sup>ns</sup>  | 0.1940 <sup>ns</sup> |
| SPD & SPM<br>Biosynthesis | <i>SISAMDC1</i>     | 0.0078**              | 0.0005***            | 0.0042**              | 0.0008***            |
|                           | <i>SISAMDC2</i>     | 0.0046**              | 0.0017**             | 0.0061**              | 0.0024**             |
|                           | <i>SISAMDC3</i>     | 0.0204*               | 0.0035**             | 0.0204*               | 0.0003***            |
|                           | <i>SISPDS1</i>      | 0.8702 <sup>ns</sup>  | 0.0342*              | 0.0518 <sup>ns</sup>  | 0.0109*              |
|                           | <i>SISPDS2</i>      | 0.0662 <sup>ns</sup>  | 0.0038**             | <0.0001****           | 0.0007***            |
|                           | <i>SISPMS</i>       | <0.0001****           | 0.0278*              | 0.0023**              | 0.0070**             |
| PA catabolism             | <i>SIPAO2</i>       | 0.0583 <sup>ns</sup>  | 0.0005***            | 0.0016**              | 0.0012**             |
|                           | <i>SIPAO4-like</i>  | 0.0525 <sup>ns</sup>  | <0.0001****          | 0.0058**              | 0.0014**             |
|                           | <i>SICuAO4</i>      | 0.1206 <sup>ns</sup>  | 0.5992 <sup>ns</sup> | 0.0270*               | 0.5992 <sup>ns</sup> |
|                           | <i>SICuAO4-like</i> | 0.0088**              | 0.0019**             | 0.0017**              | 0.0053**             |

| Specific PA Forms | PA Types | 0h vs 1h              | 0h vs 6h             | 0h vs 12h            | 0h vs 24h            |
|-------------------|----------|-----------------------|----------------------|----------------------|----------------------|
| Free              | PUT      | 0.6068 <sup>ns</sup>  | 0.1098 <sup>ns</sup> | 0.3443 <sup>ns</sup> | 0.0425*              |
|                   | SPD      | 0.9005 <sup>ns</sup>  | 0.7849 <sup>ns</sup> | 0.9291 <sup>ns</sup> | 0.5837 <sup>ns</sup> |
|                   | SPM      | >0.9977 <sup>ns</sup> | 0.7260 <sup>ns</sup> | 0.5981 <sup>ns</sup> | 0.3933 <sup>ns</sup> |
| Conjugated        | PUT      | 0.0511 <sup>ns</sup>  | 0.0004***            | 0.1331 <sup>ns</sup> | 0.0233*              |
|                   | SPD      | 0.9954 <sup>ns</sup>  | 0.9933 <sup>ns</sup> | 0.5858 <sup>ns</sup> | 0.2497 <sup>ns</sup> |
|                   | SPM      | 0.9980 <sup>ns</sup>  | 0.3040 <sup>ns</sup> | 0.3271 <sup>ns</sup> | 0.4728 <sup>ns</sup> |
| Bound             | PUT      | 0.2132 <sup>ns</sup>  | 0.0485**             | 0.9799 <sup>ns</sup> | 0.0027**             |
|                   | SPD      | 0.1446 <sup>ns</sup>  | 0.9999 <sup>ns</sup> | 0.8558 <sup>ns</sup> | 0.3788 <sup>ns</sup> |
|                   | SPM      | 0.2439 <sup>ns</sup>  | 0.3255 <sup>ns</sup> | 0.1420 <sup>ns</sup> | 0.9747 <sup>ns</sup> |

**Figure S1:** qRT-PCR of genes that encode proteins associated with photosynthesis such as nuclear encoded light-harvesting chlorophyll a/b-binding genes *LHCBI-6* and plastid encoded PSII complex gene *psbA* and *accD* genes in response to heat stress.

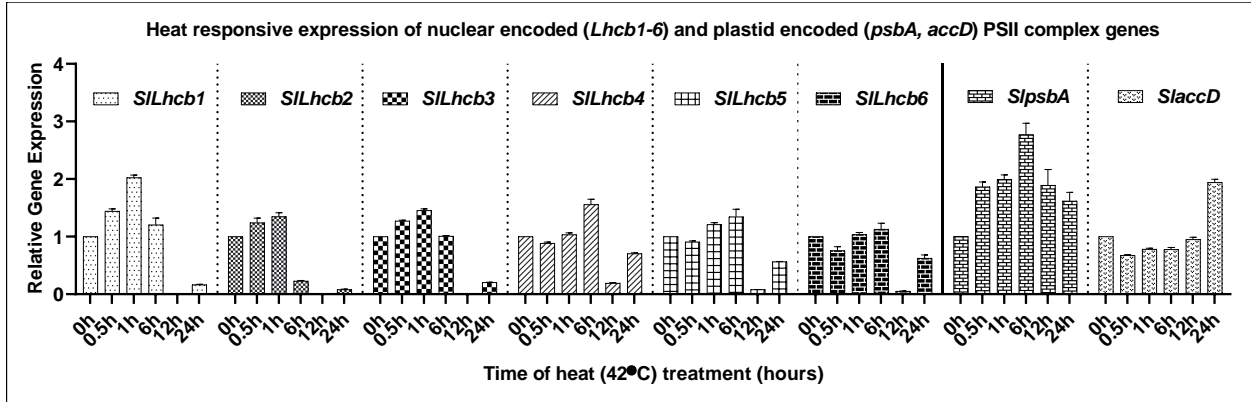

**Figure S2:** qRT-PCR of genes which encode proteins associated with photosynthesis such as nuclear encoded light-harvesting chlorophyll a/b-binding genes *LHCBI-6* and plastid encoded PSII complex genes *psbA* and *accD* genes in response to cold stress.

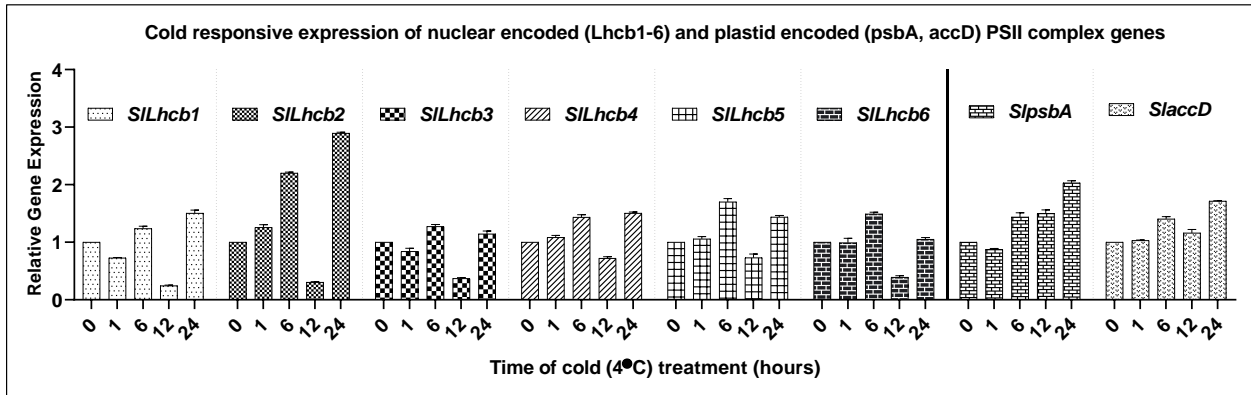

**Figure S3:** qRT-PCR of gene expression of phosphoenolpyruvate carboxylase (*PEPC*) and Isocitrate dehydrogenase (*ICDH*) genes in response to heat or cold stress

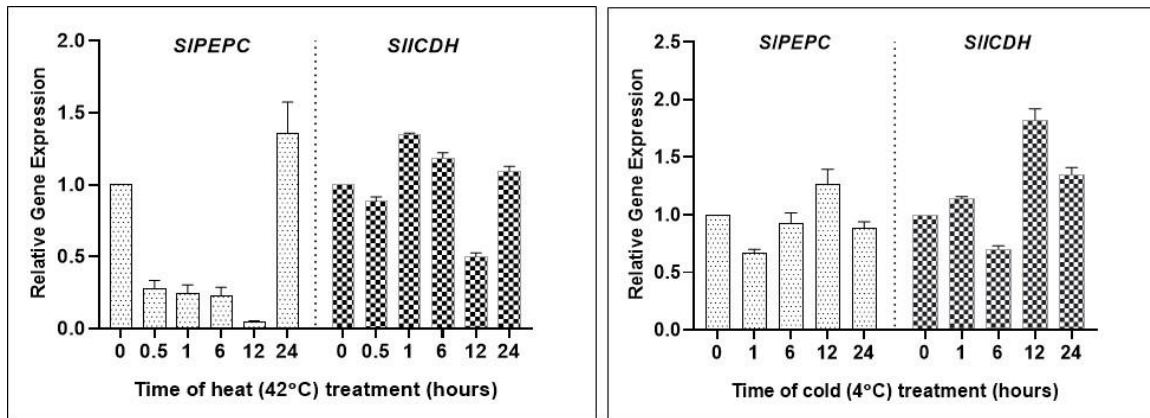

**Figure S4:** qRT-PCR gene expression of ornithine decarboxylase (*OAT1*) gene in response to heat or cold stress

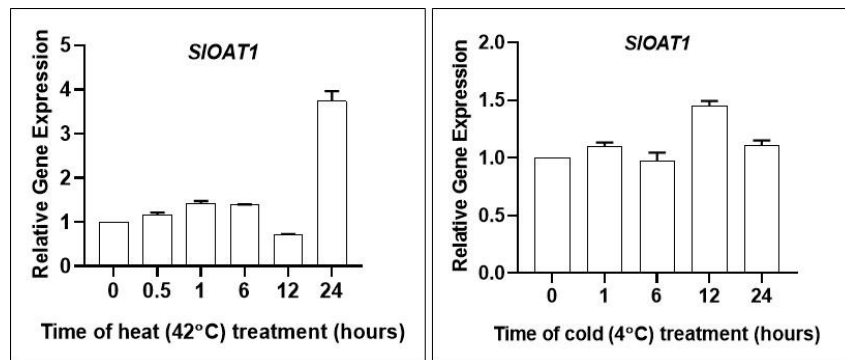

**Figure S5: PCA analyses of active and variable parameters during heat stress.** The active parameters included heat-stressed seedlings at 0.5, 1, 6, 12 and 24 h stress. The variable parameters included the levels of free (F), conjugated (C) and bound (B) PUT, SPD and SPM (PUT-F, SPD-F, SPM-F, PUT-C, SPD-C, SPM-C, PUT-B, SPD-B and SPM-B). Transcript levels of PAs biosynthesis and catabolizing enzymes genes, heat stress marker genes and photosynthesis-related genes. Before PCA analyses, all values for active and variable parameters were normalized as per cent 0-time values. Other details were the same as stated in the material and method section. Genes abbreviations are as in the TableS1. PCA analyses was performed using XLSTAT (<https://www.xlstat.com>).

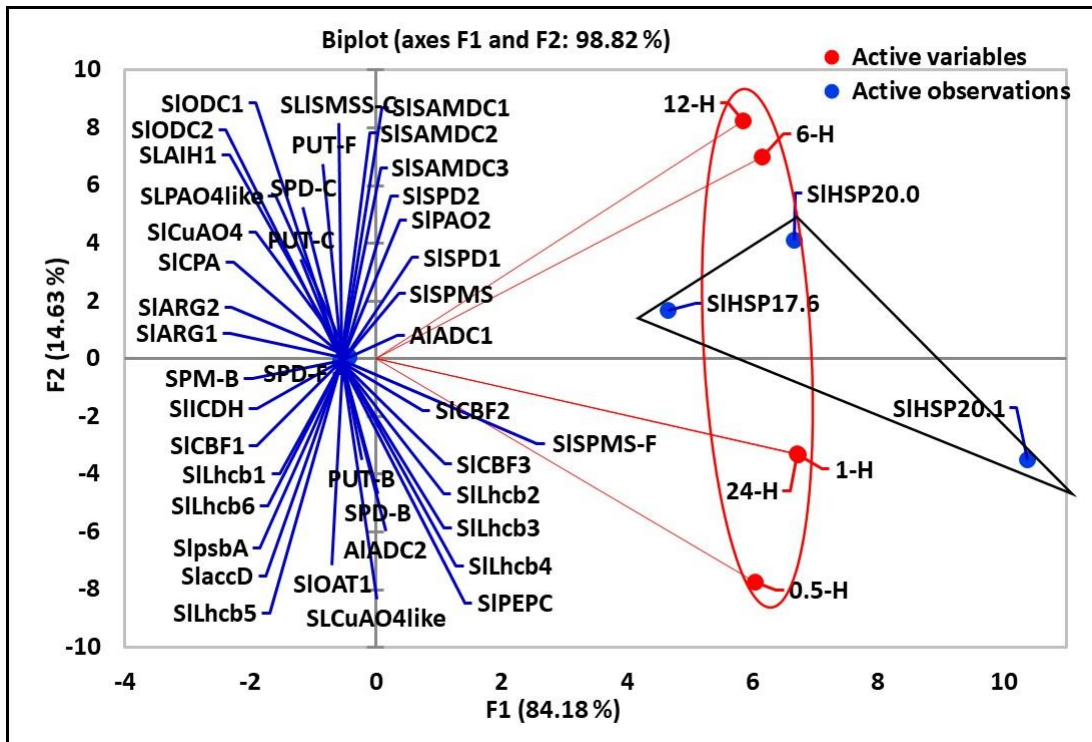

**Figure S6: PCA analyses of active and variable parameters during cold stress.** The active parameters included cold stressed seedlings at 1, 6, 12 and 24h stress. The variable parameters included the levels of free (F), conjugated (C) and bound (B) PUT, SPD and SPM (PUT-F, SPD-F, SPM-F, PUT-C, SPD-C, SPM-C, PUT-B, SPD-B and SPM-B). Transcript levels of PAs biosynthesis and catabolizing enzymes genes, cold stress marker genes and photosynthesis related genes. Before PCA analyses, all values for active and variable parameters were normalized as per cent 0-time values. Other details as stated in the material and method section. Gene abbreviations are the same as in the TableS1. PCA analyses was performed using XLSTAT (<https://www.xlstat.com>).

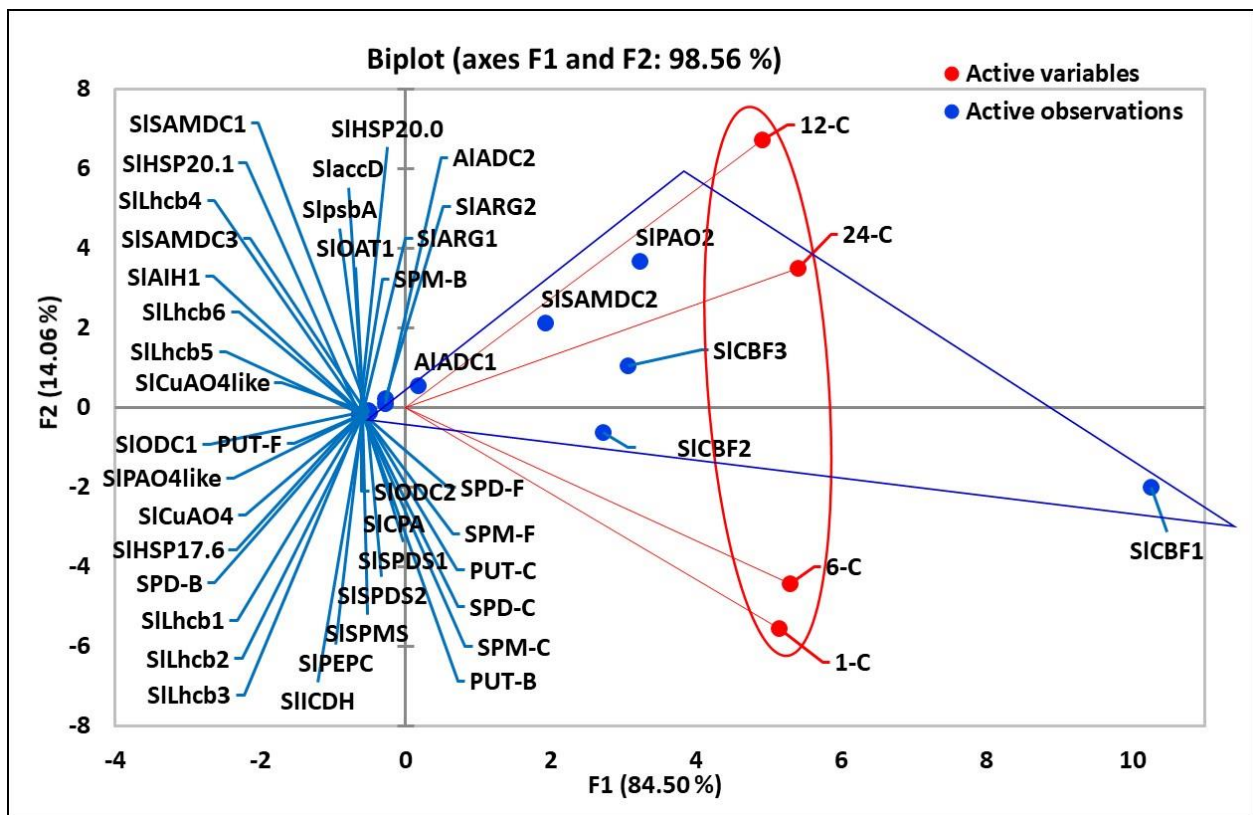





### Figure S8: Cytoscape analyses of Pooled data from cold stress

All values for the active and the variable parameters were normalized as % initial 0 time point. Before determining correlation coefficient  $r$ , the correlation coefficients were determined using Microsoft EXCEL program. These data were analyzed using Expression Correlation app of Cytoscape program (Shannon et al., 2003). Genes abbreviations are the same as in Table S1.

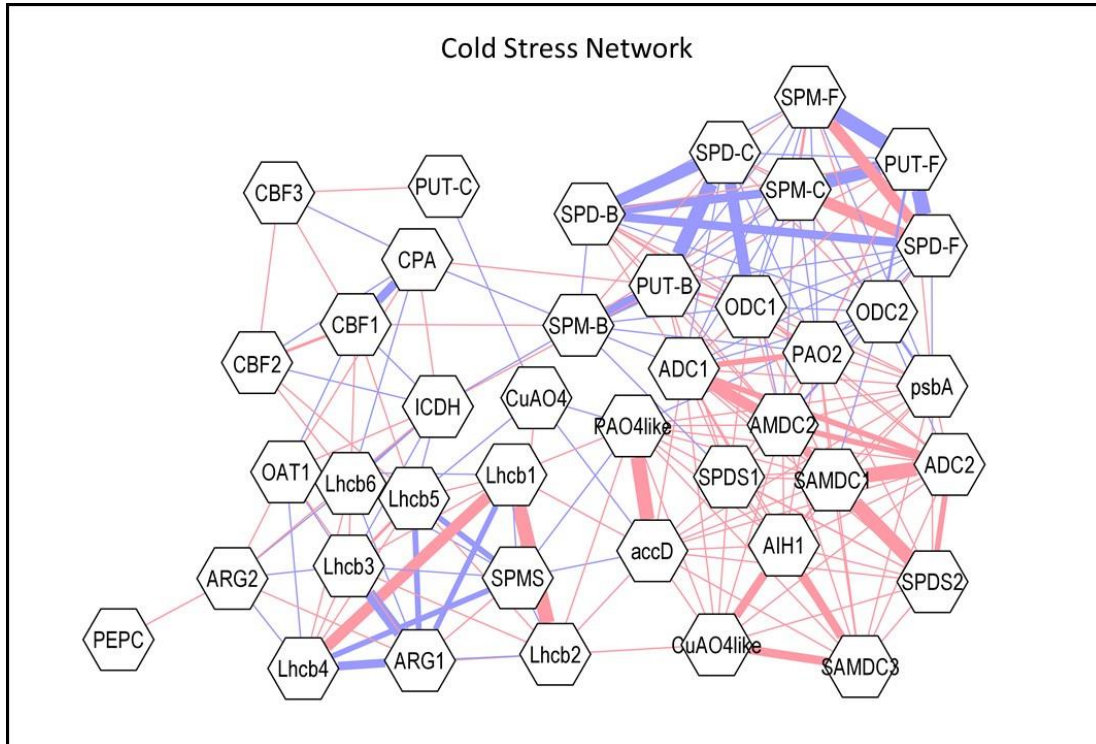

Supplement: cells-09-01749-s001.pdf [file cells-09-01749-s001.pdf]
